# Supplementary material
Source: PubMed Central journal article supplement (PMC7313376)
Supplement: NIHMS1549149-supplement-Supplemental_Material.pdf [file NIHMS1549149-supplement-Supplemental_Material.pdf]

SUPPLEMENTAL MATERIAL:

Supplemental Table I: Effect of treatment assignment on disability defined as mRS>2 at 90 days

| Outcome                                                                                | Clopidogrel + aspirin | Aspirin        | Odds ratio (95% CI) | P value |
|----------------------------------------------------------------------------------------|-----------------------|----------------|---------------------|---------|
| <b>All subjects</b>                                                                    | <b>N=2270</b>         | <b>N= 2280</b> |                     |         |
| Disability in overall population                                                       | 165 (7.3%)            | 175 (7.7%)     | 0.94 (0.76-1.18)    | 0.60    |
| Disability AND primary outcome endpoint (stroke, MI, vascular death)                   | 44 (1.9%)             | 60 (2.6%)      | 0.73 (0.49-1.08)    | 0.12    |
| Disability AND Major Hemorrhage                                                        | 9 (0.4%)              | 4 (0.2%)       | 2.26 (0.69-7.37)    | 0.16    |
| Disability attributed to recurrent stroke per local investigator                       | 23 (1.0%)             | 25 (1.1%)      | 0.92 (0.52-1.63)    | 0.78    |
| Disability attributed to index stroke per local investigator                           | 43 (1.9%)             | 66 (2.9%)      | 0.65 (0.44-0.96)    | 0.03    |
| Disability attributed to either recurrent or index stroke per local investigator       | 65 (2.9%)             | 87 (3.8%)      | 0.74 (0.54-1.03)    | 0.07    |
| <b>Patients enrolled with index stroke</b>                                             | <b>N=1281</b>         | <b>N=1305</b>  |                     |         |
| Disability in overall population                                                       | 105 (8.2%)            | 123 (9.4%)     | 0.86 (0.65-1.13)    | 0.27    |
| Disability AND primary outcome endpoint (stroke, MI, vascular death)                   | 29 (2.3%)             | 45 (3.5%)      | 0.65 (0.40-1.04)    | 0.07    |
| Disability AND Major Hemorrhage                                                        | 4 (0.3%)              | 3 (0.2%)       | 1.36 (0.30-6.09)    | 0.69    |
| Disability attributed to recurrent stroke per local investigator                       | 12 (0.9%)             | 14 (1.1%)      | 0.87 (0.40-1.89)    | 0.73    |
| Disability attributed to index stroke per local investigator                           | 36 (2.8%)             | 62 (4.8%)      | 0.58 (0.38-0.88)    | <0.01   |
| <b>Patients enrolled with TIA</b>                                                      | <b>N=989</b>          | <b>N=975</b>   |                     |         |
| Disability in overall population                                                       | 60 (6.1%)             | 52 (5.3%)      | 1.15 (0.78-1.68)    | 0.48    |
| Disability AND primary outcome endpoint (stroke, MI, vascular death)                   | 15 (1.5%)             | 15 (1.5%)      | 0.99 (0.48-2.03)    | 0.97    |
| Disability AND Major Hemorrhage                                                        | 5 (0.5%)              | 1 (0.1%)       | 4.95 (0.58-42.44)   | 0.11    |
| Disability attributed to either recurrent stroke or index event per local investigator | 17 (1.7%)             | 15 (1.5%)      | 1.12 (0.56-2.25)    | 0.75    |

Supplemental Table II: Effect of treatment assignment on disability (mRS>1) at 90 days for subjects <65 years of age

| Outcome                                                              | Clopidogrel + aspirin | Aspirin        | Odds ratio (95% CI) | P value |
|----------------------------------------------------------------------|-----------------------|----------------|---------------------|---------|
| <b>All subjects &lt; 65 years old</b>                                | <b>N=1110</b>         | <b>N= 1127</b> |                     |         |
| Disability in overall population                                     | 132 (11.9%)           | 133 (11.8%)    | 1.01 (0.78-1.30)    | 0.95    |
| Disability AND primary outcome endpoint (stroke, MI, vascular death) | 16 (1.4%)             | 21 (1.9%)      | 0.77 (0.40-1.48)    | 0.43    |
| Disability AND Major Hemorrhage                                      | 2 (0.2%)              | 2 (0.2%)       | 1.02 (0.14-7.22)    | 0.99    |
| Disability attributed to recurrent stroke per local investigator     | 9 (0.8%)              | 9 (0.8%)       | 1.02 (0.40-2.57)    | 0.97    |
| Disability attributed to index stroke per local investigator         | 13 (1.2%)             | 32 (2.8%)      | 0.41 (0.21-0.78)    | 0.005   |
| <b>Patients enrolled with index stroke &amp; &lt; 65 years old</b>   | <b>N=678</b>          | <b>N=689</b>   |                     |         |
| Disability in overall population                                     | 103 (15.2%)           | 110 (16.0%)    | 0.94 (0.70-1.26)    | 0.69    |
| Disability AND primary outcome endpoint (stroke, MI, vascular death) | 12 (1.8%)             | 16 (2.3%)      | 0.76 (0.36-1.61)    | 0.47    |
| Disability AND Major Hemorrhage                                      | 2 (0.3%)              | 1 (0.2%)       | 2.04 (0.18-22.50)   | 0.55    |
| Disability attributed to recurrent stroke per local investigator     | 7 (1.0%)              | 5 (0.7%)       | 1.43 (0.45-4.52)    | 0.54    |
| Disability attributed to index stroke per local investigator         | 12 (1.8%)             | 29 (4.2%)      | 0.41 (0.21-0.81)    | <0.01   |
| <b>Patients enrolled with TIA &amp; &lt; 65 years old</b>            | <b>N=432</b>          | <b>N=438</b>   |                     |         |
| Disability in overall population                                     | 29 (6.7%)             | 23 (5.3%)      | 1.30 (0.74-2.28)    | 0.36    |
| Disability AND primary outcome endpoint (stroke, MI, vascular death) | 4 (0.9%)              | 5 (1.1%)       | 0.81 (0.22-3.03)    | 0.75    |
| Disability AND Major Hemorrhage                                      | 0 (0.0%)              | 1 (0.2%)       | NE                  | 1       |
| Disability attributed to recurrent stroke per local investigator     | 2 (0.5%)              | 4 (0.9%)       | 0.50 (0.09-2.77)    | 0.42    |
| Disability attributed to index stroke per local investigator         | 1 (0.2%)              | 3 (0.7%)       | 0.34 (0.03, 3.25)   | 0.32    |

Supplemental Table III: Effect of treatment assignment on disability (mRS>1) at 90 days for subjects ≥ 65 years of age

| Outcome                                                              | Clopidogrel + aspirin | Aspirin        | Odds ratio (95% CI) | P value |
|----------------------------------------------------------------------|-----------------------|----------------|---------------------|---------|
| <b>All subjects ≥65 years old</b>                                    | <b>N=1160</b>         | <b>N= 1153</b> |                     |         |
| Disability in overall population                                     | 192 (16.6%)           | 202 (17.5%)    | 0.93 (0.75-1.16)    | 0.53    |
| Disability AND primary outcome endpoint (stroke, MI, vascular death) | 28 (2.4%)             | 39 (3.4%)      | 0.71 (0.43-1.16)    | 0.16    |
| Disability AND Major Hemorrhage                                      | 7 (0.6%)              | 2 (0.2%)       | 3.49 (0.72-16.85)   | 0.10    |
| Disability attributed to index stroke per local investigator         | 30 (2.6%)             | 34 (3.0%)      | 0.87 (0.53-1.44)    | 0.60    |
| <b>Patients enrolled with index stroke &amp; ≥65 years old</b>       | <b>N=603</b>          | <b>N=616</b>   |                     |         |
| Disability in overall population                                     | 118 (19.6%)           | 140 (22.7%)    | 0.83 (0.63-1.09)    | 0.18    |
| Disability AND primary outcome endpoint (stroke, MI, vascular death) | 17 (2.8%)             | 29 (4.7%)      | 0.59 (0.32-1.08)    | 0.08    |
| Disability AND Major Hemorrhage                                      | 2 (0.3%)              | 2 (0.3%)       | 1.02 (0.14-7.28)    | 0.98    |
| Disability attributed to index stroke per local investigator         | 24 (4.0%)             | 33 (5.4%)      | 0.73 (0.43-1.25)    | 0.25    |
| <b>Patients enrolled with TIA &amp; ≥65 years old</b>                | <b>N=557</b>          | <b>N=537</b>   |                     |         |
| Disability in overall population                                     | 74 (13.3%)            | 62 (11.6%)     | 1.17 (0.82-1.68)    | 0.38    |
| Disability AND primary outcome endpoint (stroke, MI, vascular death) | 11 (2.0%)             | 10 (1.9%)      | 1.06 (0.45-2.52)    | 0.89    |
| Disability AND Major Hemorrhage                                      | 5 (0.5%)              | 0 (0.0%)       | NE                  | 0.06    |
| Disability attributed to index stroke per local investigator         | 6 (1.1%)              | 1 (0.2%)       | 5.84 (0.70-48.64)   | 0.12    |
